# Supplementary material for: NECAB3 Promotes Activation of Hypoxia-inducible factor-1 during Normoxia and Enhances Tumourigenicity of Cancer Cells
Source: PubMed Central journal article supplement (PMC4780031; doi:10.1038/srep22784), 2016-03-07
Supplement: srep22784-s1.pdf [file srep22784-s1.pdf]

# NECAB3 Promotes Activation of Hypoxia-inducible factor-1 during Normoxia and Enhances Tumorigenicity of Cancer Cells

Hiroki J. Nakaoka<sup>1,2</sup>, Toshiro Hara<sup>1</sup>, Seiko Yoshino<sup>1,2</sup>, Akane Kanamori<sup>2</sup>, Yusuke Matsui<sup>3</sup>,  
Tepei Shimamura<sup>3</sup>, Hiroshi Sato<sup>4</sup>, Yoshinori Murakami<sup>2</sup>, Motoharu Seiki<sup>1,5</sup> & Takeharu  
Sakamoto<sup>1,2</sup>

## Supplementary Materials and Methods

**shRNA sequences.** shRNAs against Mint3 had sequence 5'-gaugauggcgguggugacgggacgaaucccgucaccaccgcca-3' (#1) and 5'-gcggguucuugguccuguaugacgaaucauacaggaccaagaaccgc-3' (#2).

**Primer sequences.** Primers specific for *NECAB1* (sense, 5'-ttcctcgacatactgaggag-3' and antisense, 5'-tcacatagctcttctgtgc-3'), *NECAB2* (sense, 5'-cgacagaaccacatcaaacc-3' and antisense, 5'-atcctccgtggcagatggaa-3'), *NECAB3* (sense, 5'-ccgcagagcagacaagaatg-3' and antisense, 5'-ccagtgctctgagaagtag-3') were used for real-time PCR.

**Antibodies.** Rabbit antibodies against calnexin (Abcam, Cambridge, U.K.) and EEA1 (Cell Signaling Technology, Danvers, MA) were used for immunostaining.

## Supplementary Figures.

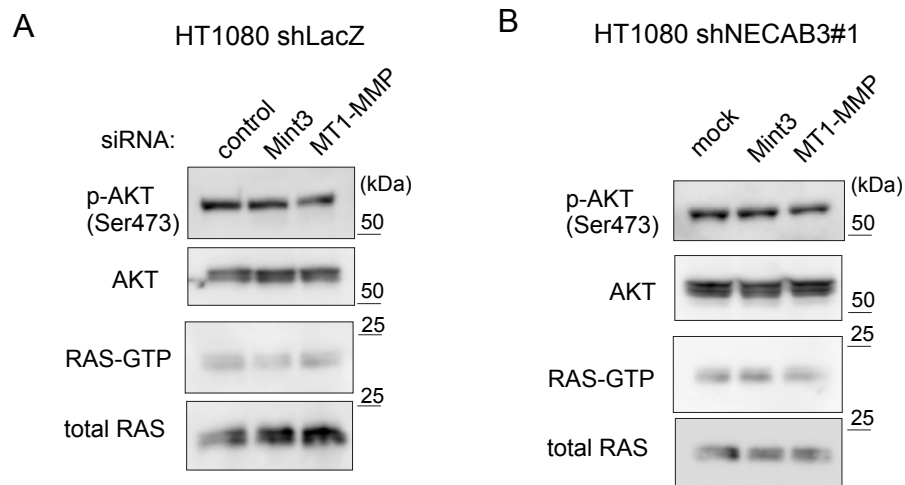

**Figure S1. Knockdown or overexpression of MT1-MMP and Mint3 did not affect AKT phosphorylation and Rac activation.**

(A-B) Immunoblotting of phospho-AKT (Ser473), AKT, active Ras (Ras-GTP), and total Ras in whole cell lysates from control (HT1080shLacZ, **A**) or NECAB3-depleted cells (HT1080shNECAB3#1, **B**) transfected with siRNAs against MT1-MMP, Mint3, or control sequences.

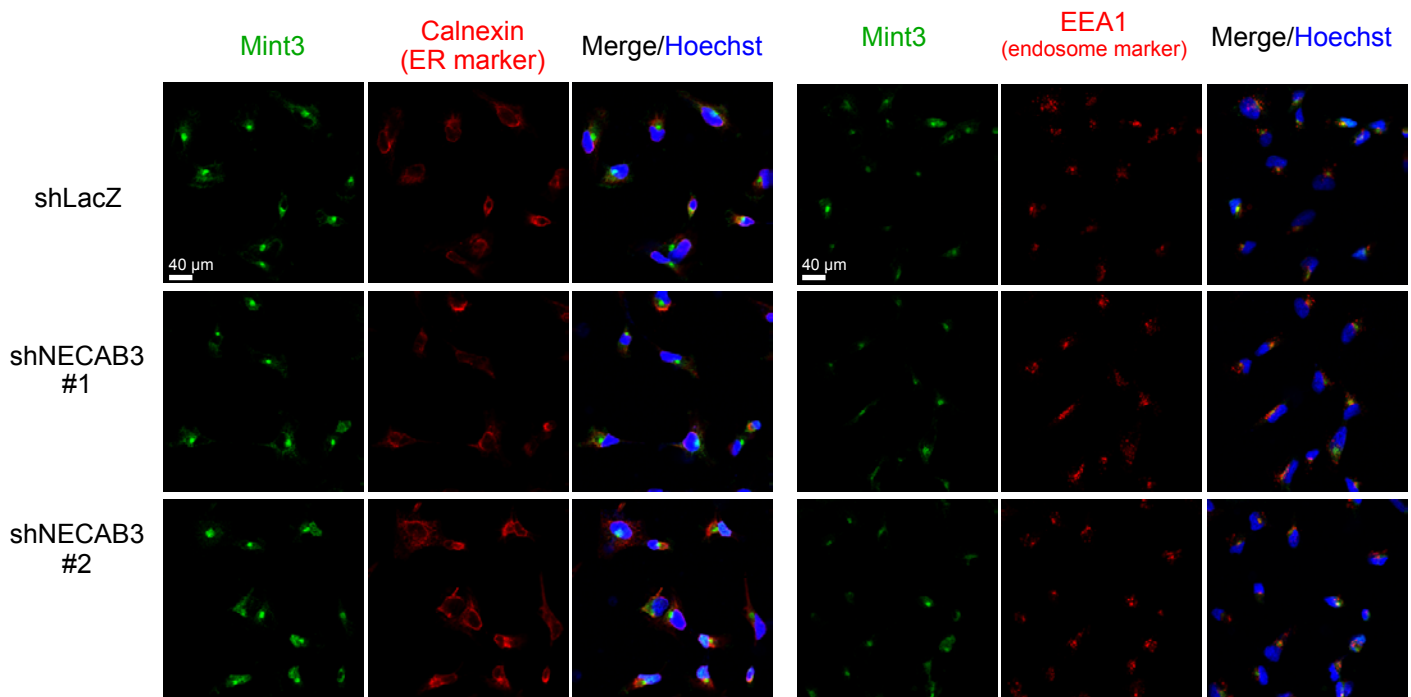

**Figure S2. Immunostaining of Mint3, calnexin, and EEA1 in NECAB3-depleted HT1080 cells.**

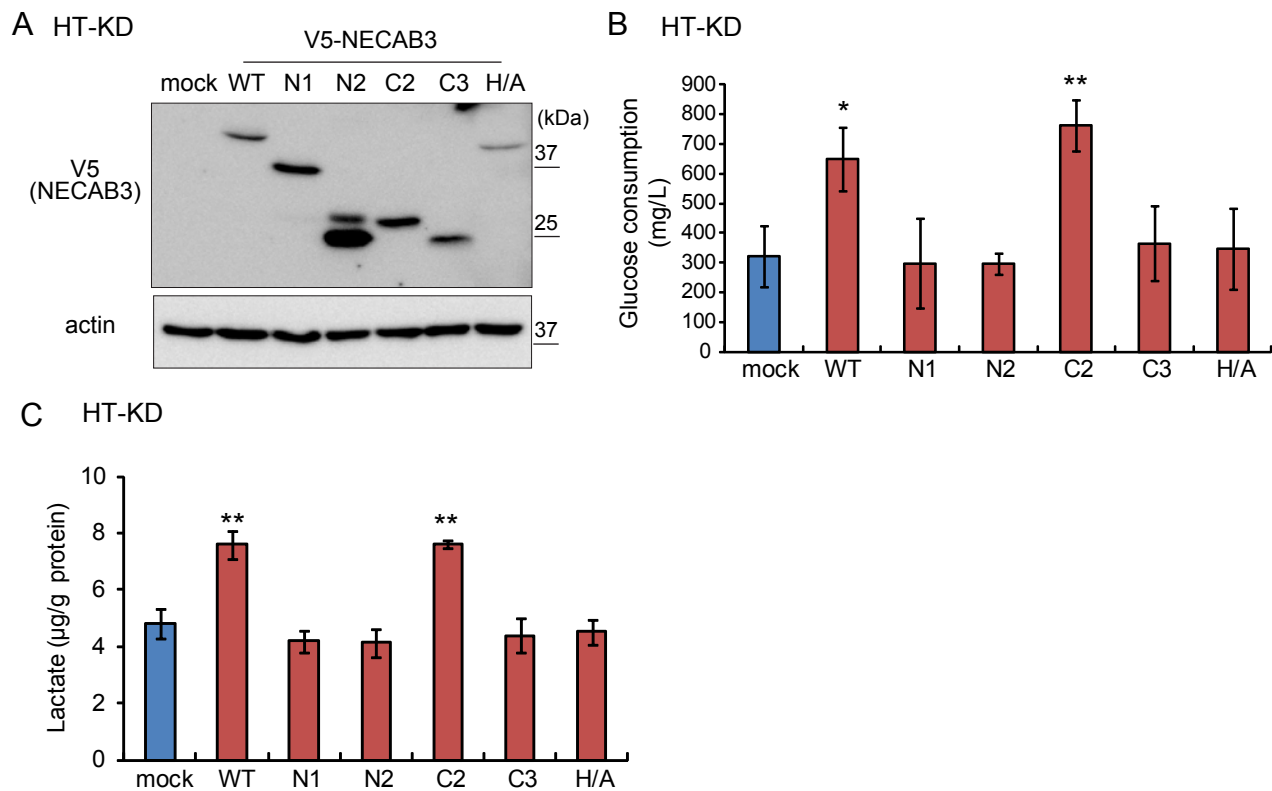

**Figure S3. Wild-type and C2 mutant of NECAB3 restores glycolysis during normoxia in NECAB3-depleted HT1080 cells.**

(A) Expression of V5-tagged NECAB3 and its mutants in NECAB3-depleted HT1080 cells.

(B, C) Glucose consumption (B) and lactate production (C) in NECAB3-depleted HT1080 cells expressing NECAB3 derivatives. In B and C, error bars indicate s.d. (n = 3), and data were analysed by t-test. \*, p < 0.05 and \*\*, p < 0.01.

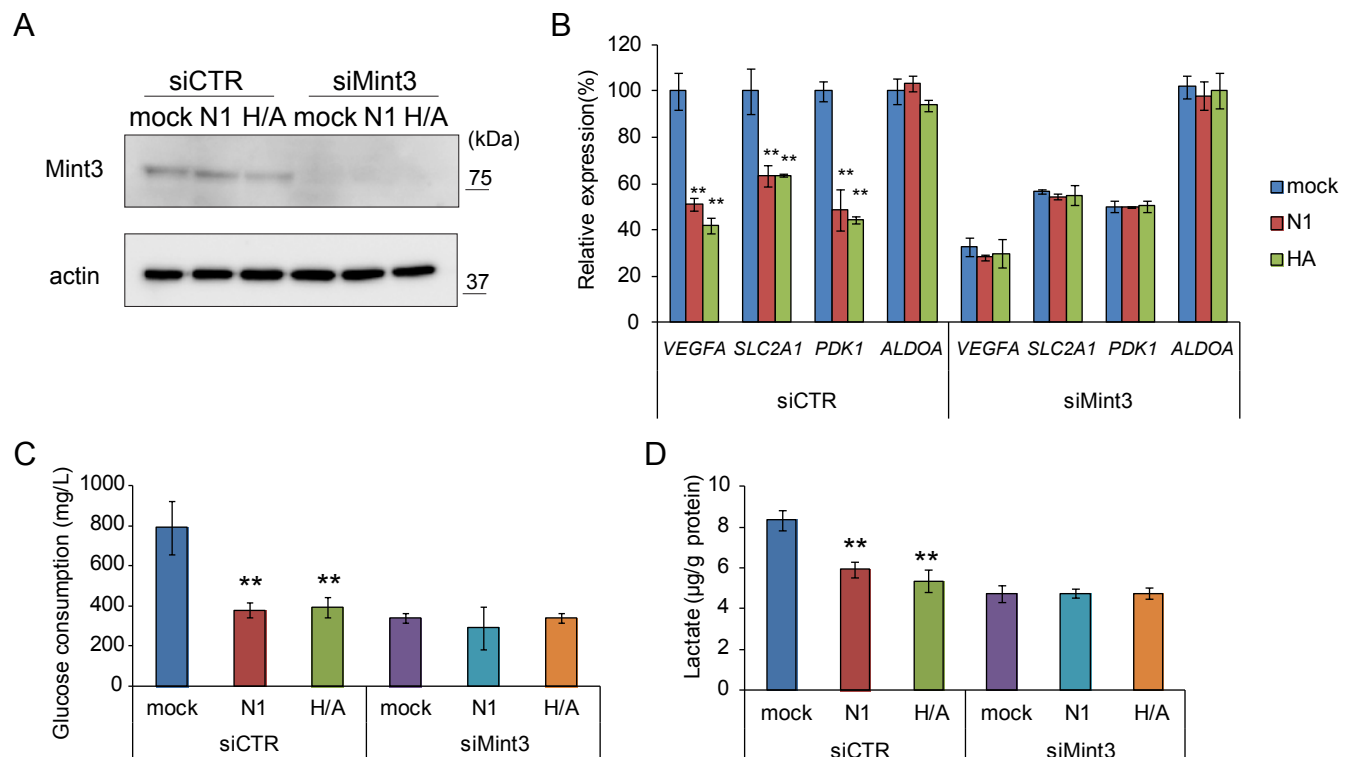

**Figure S4. Dominant-negative effects of NECAB3 mutants require Mint3.**

(A) Immunoblotting of Mint3 and actin in whole lysates from HT1080 cells expressing mock, NECAB3 N1, or H/A mutants and transfected with control or Mint3 siRNA.

(B-D) Gene expression (B), glucose consumption (C), and lactate production (D) in HT1080 cells expressing mock or NECAB3 dominant negative mutants and transfected with control or Min3 siRNA.

In B-D, error bars represent s.d. (n = 3), and data were compared pairwise by t-test. \*\*, p < 0.01.

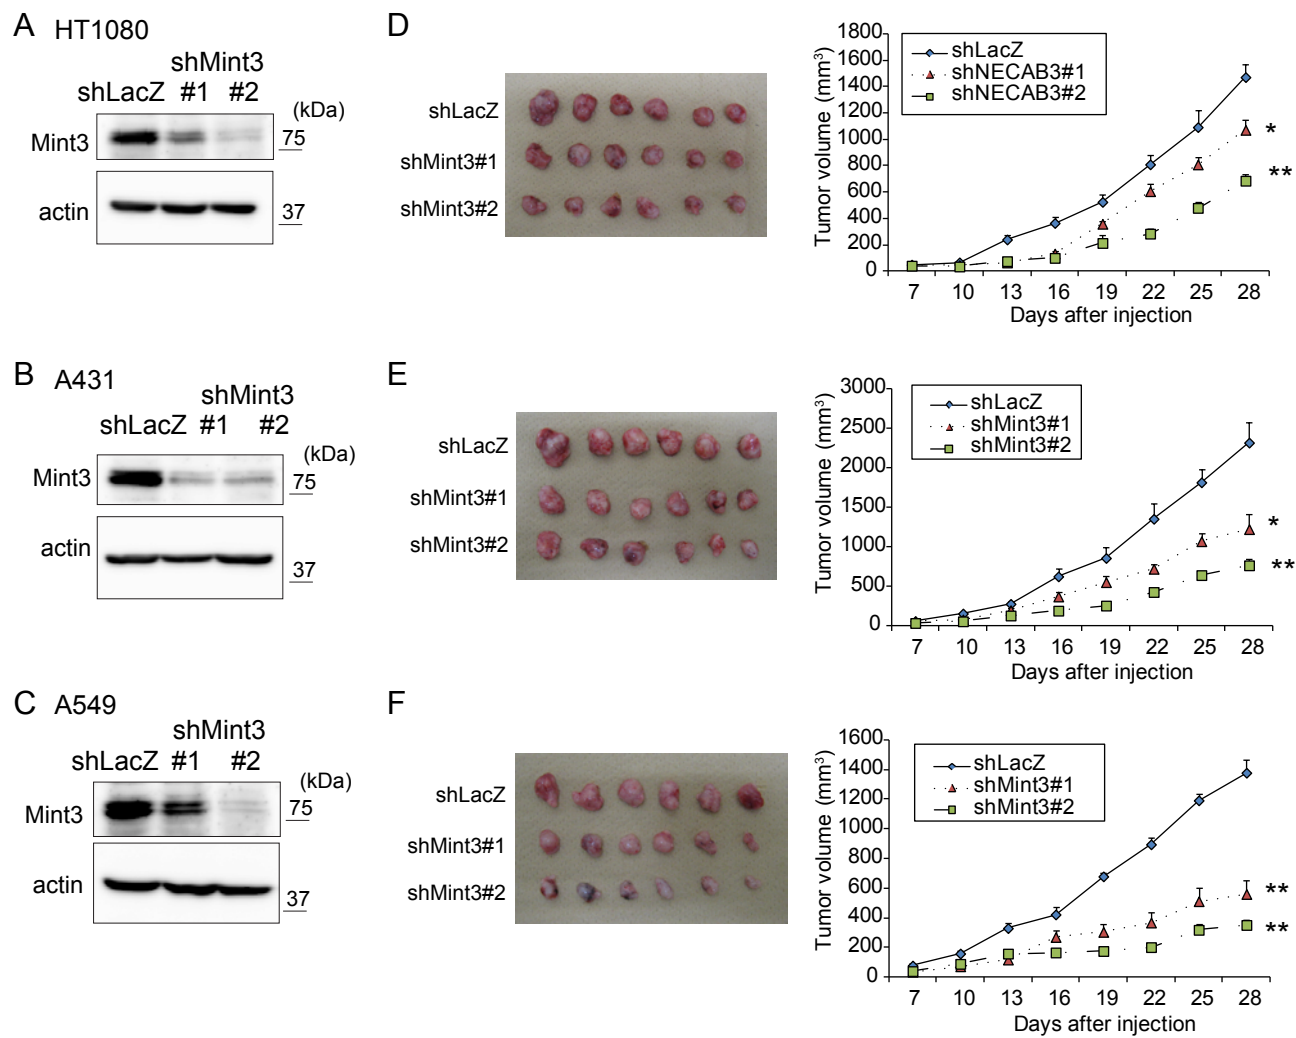

**Figure S5. Mint3 depletion attenuates growth of cancer cells implanted in vivo.**

(A-C) Immunoblotting of Mint3 and actin in whole cell lysates from control (shLacZ) or Mint3-depleted (shMint3) HT1080 (A), A431 (B), and A549 cells (C).

(D-F) Growth of Mint3-depleted HT1080 (D), A431 (E), and A549 cells (F) implanted into immunodeficient mice. Photos show tumours at day 28 after injection. Error bars indicate s.e.m. (n = 6), and data were analysed by Mann-Whitney U-test. \*, p < 0.05 and \*\*, p < 0.01.

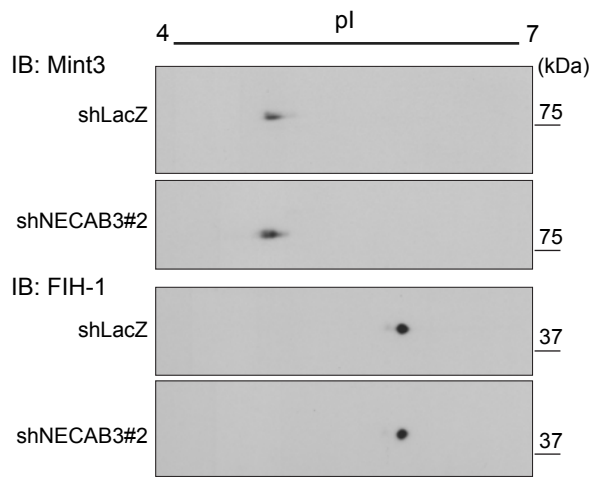

**Figure S6. NECAB3 depletion does not affect phosphorylation of Mint3.**

The acidity of Mint3 and FIH-1 in control (shLacZ) or NECAB3-depleted HT1080 cells was analysed by 2D electrophoresis and immunoblotting.

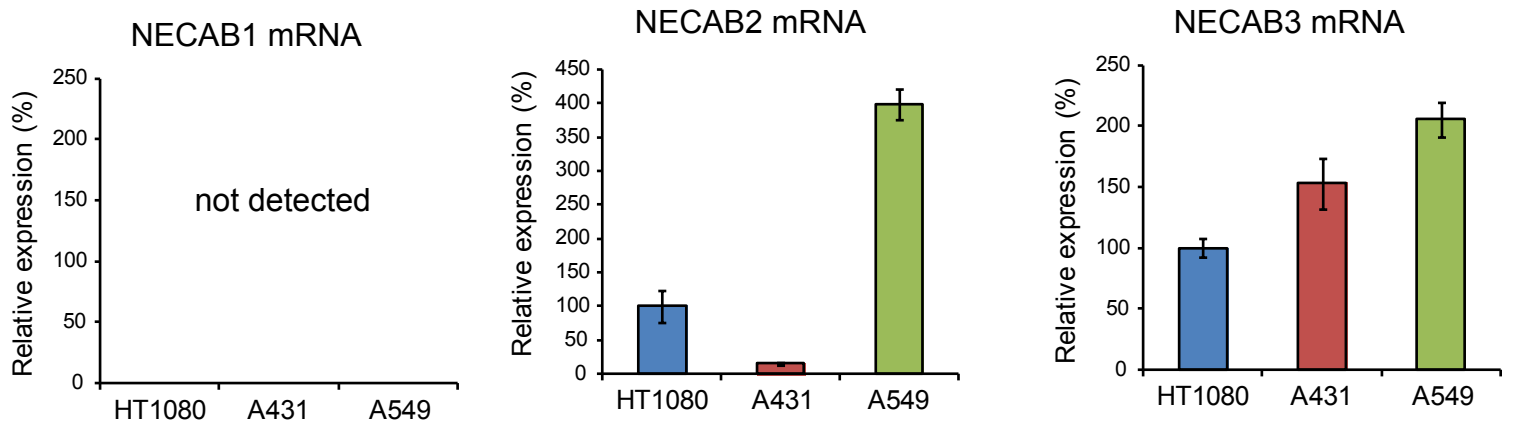

**Figure S7. Expression of NECAB genes in cancer cells.**

Expression of NECAB1, NECAB2, and NECAB3 was analysed by real-time PCR in HT1080, A431, and A549 cells. NECAB1 expression was not detectable in all cells.

| gene name | reference sequence | start | stop |
|-----------|--------------------|-------|------|
| NECAB3    | NM_031231.2        | 336   | 972  |
|           |                    | 546   | 1019 |
| APLP2     | NM_001642.1        | 2124  | 2581 |
|           |                    | 2127  | 3191 |
|           |                    | 2139  | 3190 |
|           |                    | 2142  | 3248 |
|           |                    | 2160  | 3084 |
|           |                    | 2166  | 2579 |
|           |                    | 2184  | 3238 |
|           |                    | 2184  | 3188 |
|           |                    | 2184  | 3252 |
|           |                    | 2184  | 3238 |
|           |                    | 2208  | 3558 |
|           |                    | 2235  | 3080 |
| BTBD15    | NM_014155.3        | 51    | 1602 |
|           |                    | 360   | 1599 |
|           |                    | 687   | 1576 |
|           |                    | 1032  | 1485 |
| ESE-1     | U73844.1           | 645   | 1229 |
| HSD17B1   | NM_000413.1        | -385  | 694  |
|           |                    | -376  | 318  |
|           |                    | -373  | 699  |
| SOX13     | NM_005686.2        | 903   | 1594 |
| SOX7      | NM_031439.2        | -70   | 860  |
|           |                    | -58   | 871  |
| ZNF143    | NM_003442.4        | 330   | 1448 |

**Table S1. Prey fragments identified from yeast two-hybrid screens against Mint3.**
